# Supplementary material for: Remarkable proton conducting behavior driven by synergistic effects in acid–base conjugated MOFs impregnated with sulphuric acid molecules
Source: Royal Society of Chemistry journal article supplement (doi:10.1039/d2dt01816k), 2022-01-01
Supplement: d2dt01816k1.pdf [file d2dt01816k1.pdf]

## Supporting Information

Remarkable proton conducting behavior driven by the synergistic effects in an acid base conjugated MOFs impregnated with sulphuric acid molecules

Lu Feng<sup>a,§</sup>, Shuyang Bian<sup>c,§</sup>, Kun Zhang<sup>b,\*</sup> and Hong Zhou<sup>a,\*</sup>

<sup>a</sup> College of Chemistry and Environmental Technology, Wuhan Institute of Technology, Wuhan 430073, Hubei, China.

<sup>b</sup> Automotive Engineering Research Institute, Jiangsu University, 301 Xuefu road, Zhenjiang 212013, P. R. China.

<sup>c</sup> School of Chemistry and Chemical Engineering, Nanjing University of Science and Technology, Nanjing, Jiangsu 210094, China.

§ These authors contributed equally to this work.

\* Corresponding Authors: [hzhohu@126.com](mailto:hzhohu@126.com) (H. Zhou); [zh198958@126.com](mailto:zh198958@126.com) (K. Zhang)

Table S1. Elemental analysis for  $\text{UiO-66-SO}_3^- \text{-NH}_3^+$

| Sample                                | N(%) | C(%)  | H(%) | S(%) |
|---------------------------------------|------|-------|------|------|
| $\text{UiO-66-SO}_3^- \text{-NH}_3^+$ | 2.62 | 27.73 | 2.55 | 3.26 |

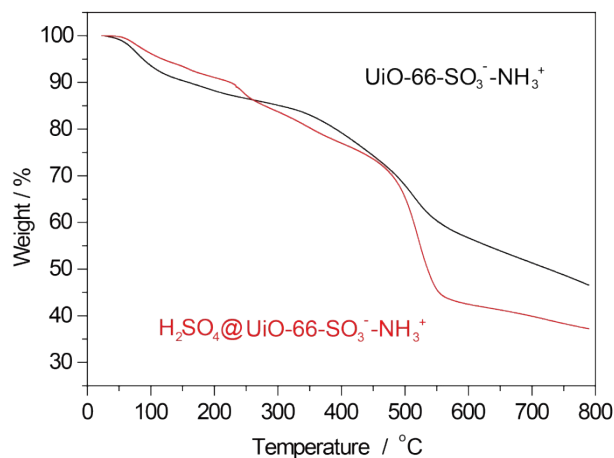

Fig. S1. TG plots of  $\text{UiO-66-SO}_3^- \text{-NH}_3^+$  and  $\text{H}_2\text{SO}_4@ \text{UiO-66-SO}_3^- \text{-NH}_3^+$ .

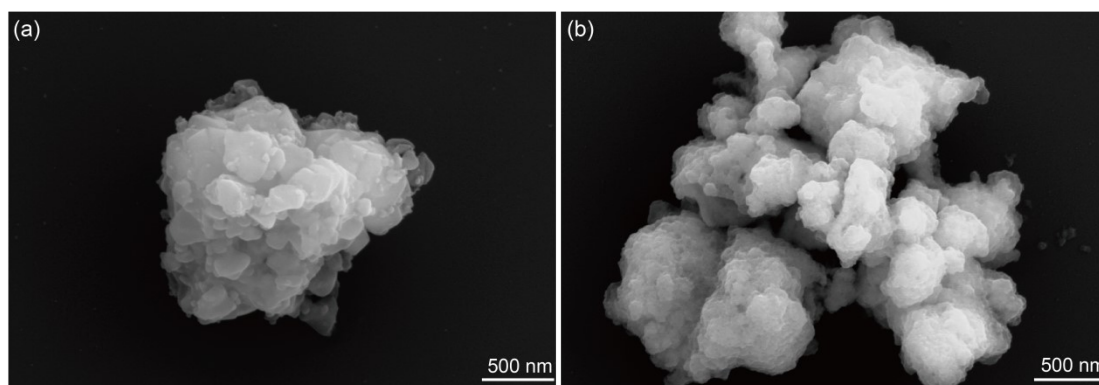

Fig. S2. SEM of composites: (a) for  $\text{UiO-66-SO}_3^- \text{-NH}_3^+$  and (b) for  $\text{H}_2\text{SO}_4@ \text{UiO-66-SO}_3^- \text{-NH}_3^+$ .

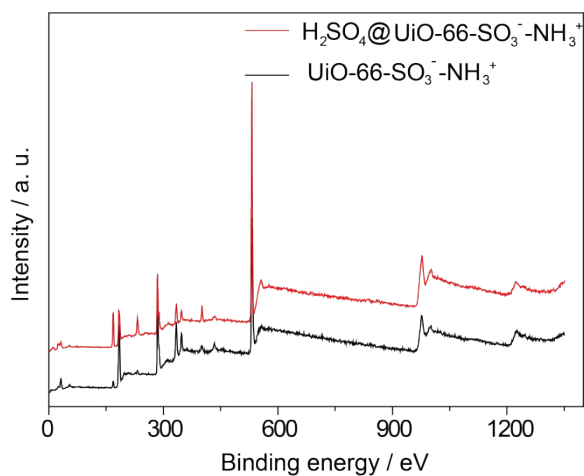

Fig. S3. XPS of  $\text{UiO-66-SO}_3^- \text{-NH}_3^+$  and  $\text{H}_2\text{SO}_4@ \text{UiO-66-SO}_3^- \text{-NH}_3^+$ .

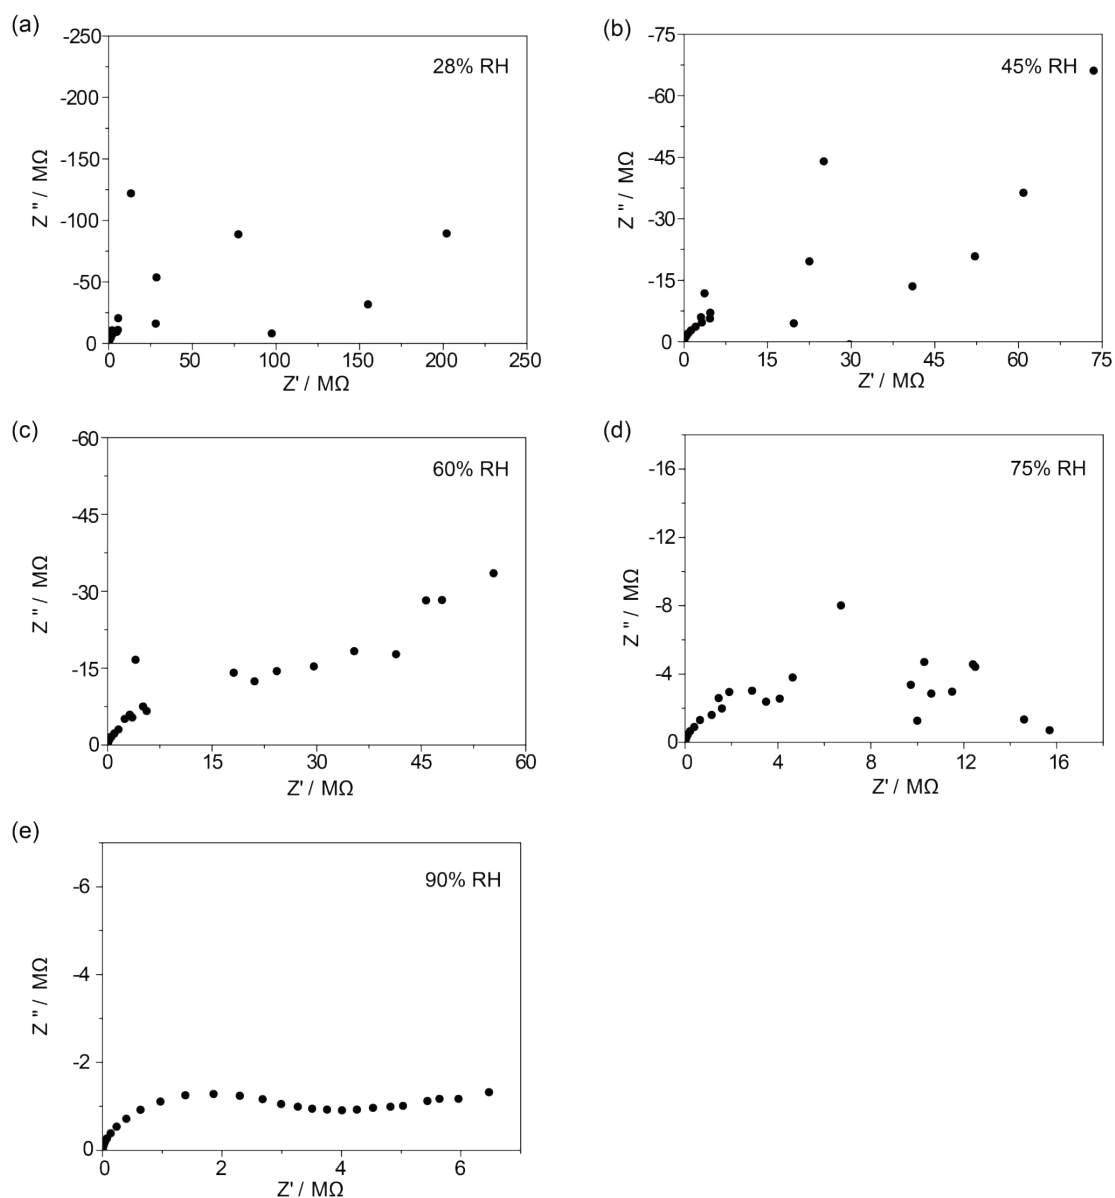

Fig. S4. Nyquist plots of UiO-66-SO<sub>3</sub><sup>-</sup>-NH<sub>3</sub><sup>+</sup> at 30 °C and different relative humidity.

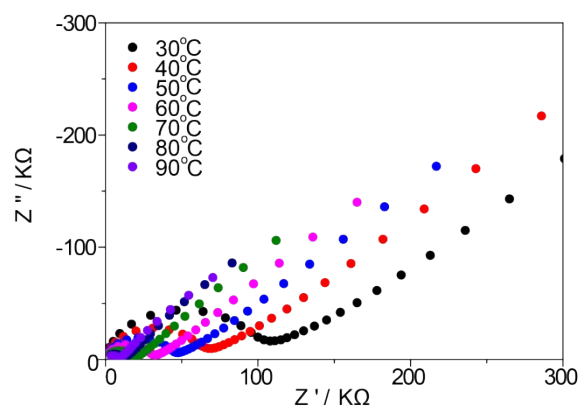

Fig. S5. Nyquist plots of UiO-66-SO<sub>3</sub><sup>-</sup>-NH<sub>3</sub><sup>+</sup> versus different temperature at 100% RH.

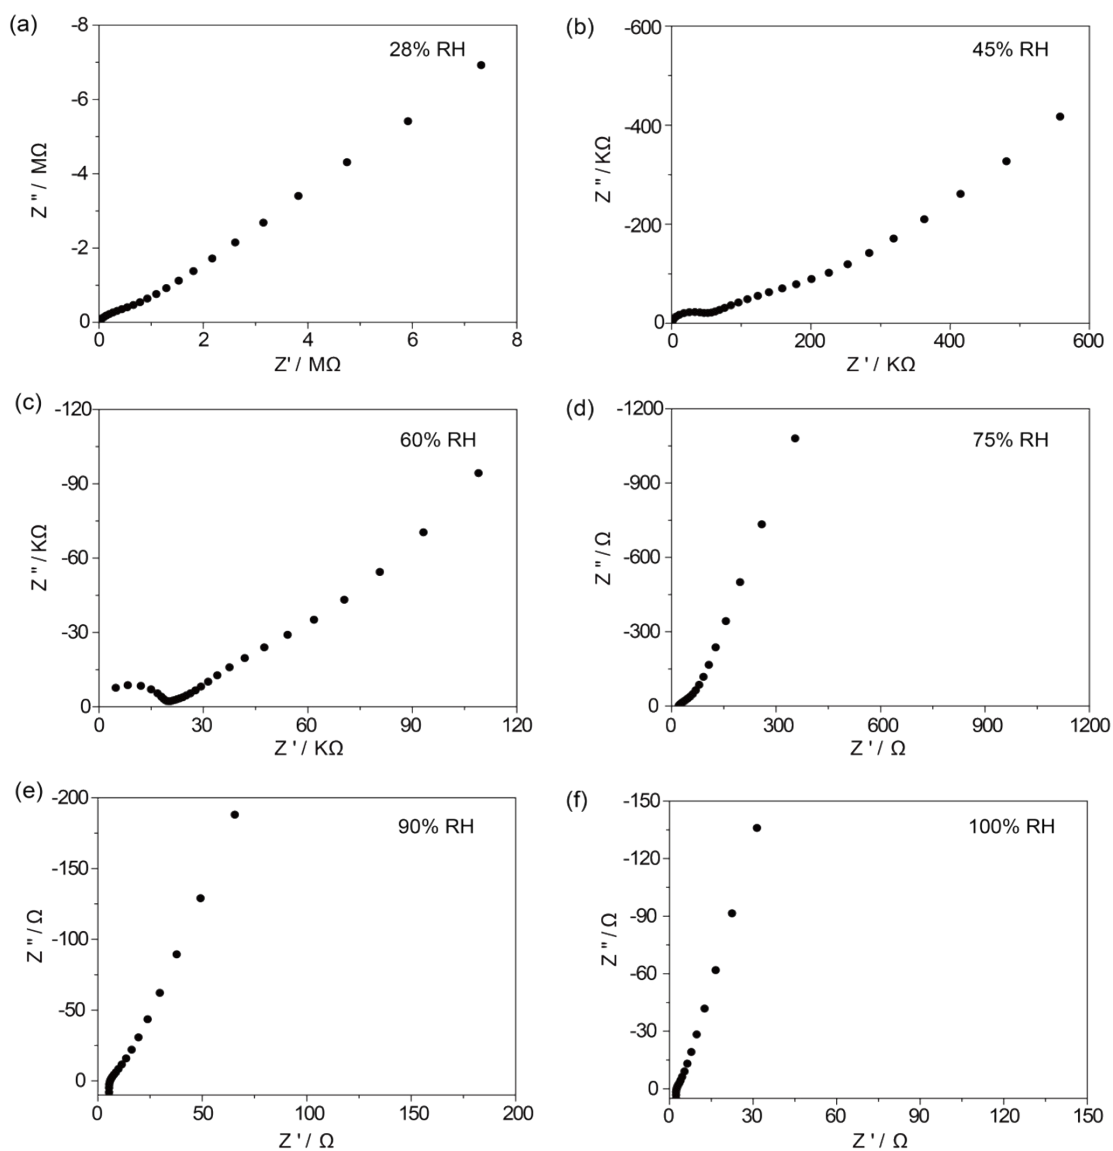

Fig. S6. Nyquist plots of  $H_2SO_4@UiO-66-SO_3^-NH_3^+$  versus different relative humidity at 30 °C.

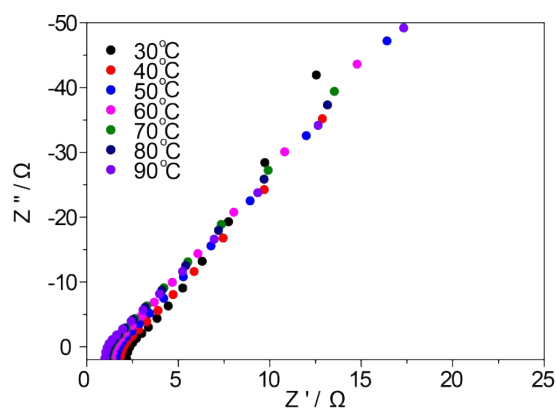

Fig. S7. Nyquist plots of  $H_2SO_4@UiO-66-SO_3^-NH_3^+$  versus different temperature at 100% RH.

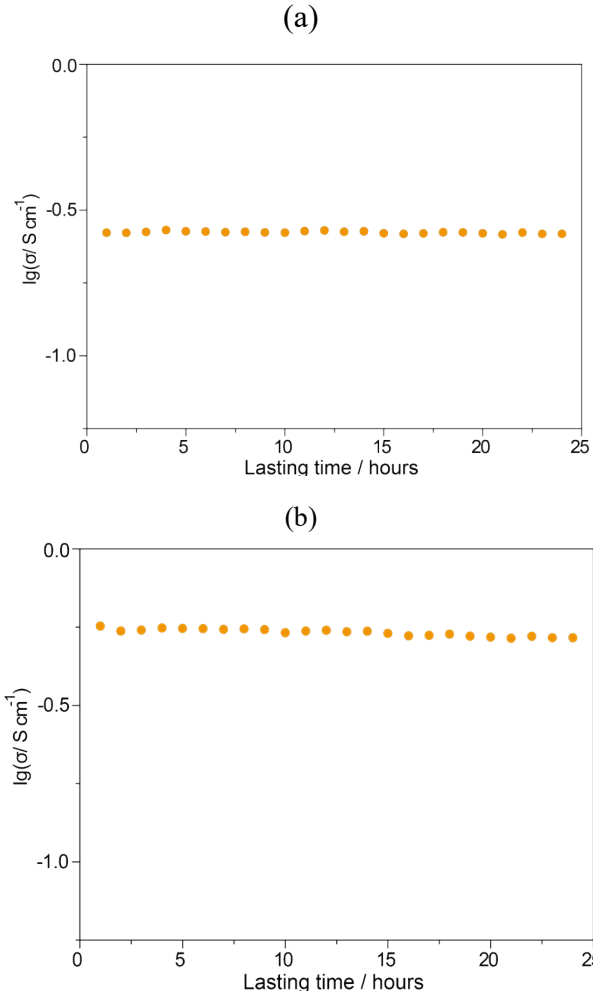

Fig. S8. Long-term proton conducting durability measurement of  $\text{H}_2\text{SO}_4@\text{UiO-66-SO}_3^- \text{-NH}_3^+$  at 100% RH and 30 °C (a) as well as 90 °C (b).

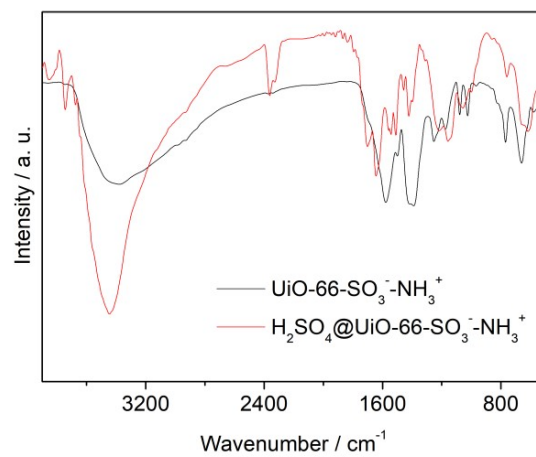

Fig. S9. Complete IR spectra of  $\text{H}_2\text{SO}_4@\text{UiO-66-SO}_3^- \text{-NH}_3^+$  and  $\text{UiO-66-SO}_3^- \text{-NH}_3^+$ .

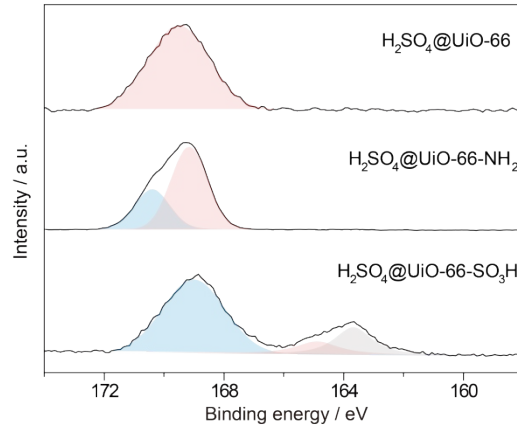

Fig. S10. S binding energy of  $\text{H}_2\text{SO}_4@\text{UiO-66}$ ,  $\text{H}_2\text{SO}_4@\text{UiO-66-NH}_2$  and  $\text{H}_2\text{SO}_4@\text{UiO-66-SO}_3\text{H}$ .

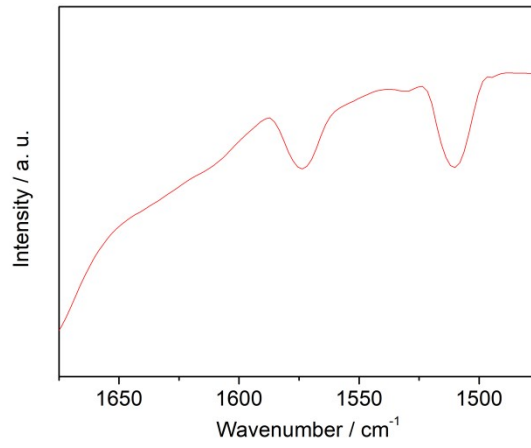

Fig. S11. IR spectrum of  $\text{H}_2\text{SO}_4@\text{UiO-66}$ .

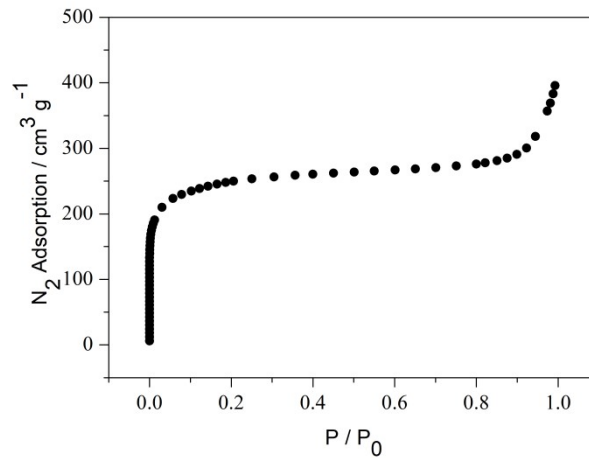

Fig. S12. Nitrogen adsorption of washed  $\text{H}_2\text{SO}_4@\text{UiO-66-SO}_3^--\text{NH}_3^+$ .

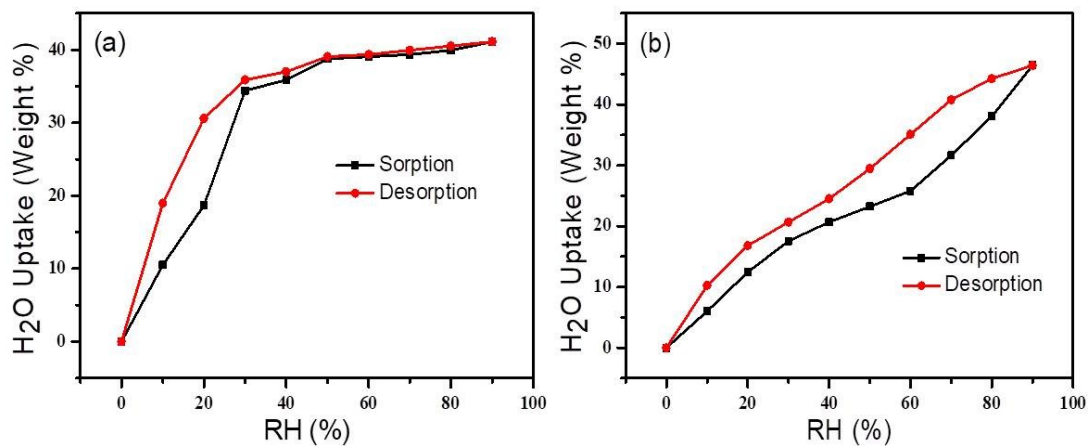

Fig. S13 Water adsorption–desorption isotherms of UiO-66-SO<sub>3</sub><sup>-</sup>-NH<sub>3</sub><sup>+</sup> (a) and H<sub>2</sub>SO<sub>4</sub>@UiO-66-SO<sub>3</sub><sup>-</sup>-NH<sub>3</sub><sup>+</sup> (b) measured at 25 °C.
